# Supplementary material for: Prostaglandin 15d-PGJ2 Inhibits Androgen Receptor Signaling in Prostate Cancer Cells
Source: Oxford University Press journal article supplement (doi:10.1210/me.2012-1313), 2012-11-29
Supplement: 1.12-1313_supplemental_data.pdf [file 1.12-1313_supplemental_data.pdf]

## Supplemental Data

Prostaglandin 15d-PGJ<sub>2</sub> inhibits androgen receptor signaling in prostate cancer cells

Sanna Kaikkonen<sup>1</sup>, Ville Paakinaho<sup>1</sup>, Päivi Sutinen<sup>1</sup>, Anna-Liisa Levonen<sup>2</sup> and Jorma J Palvimo<sup>1</sup>

<sup>1</sup>*Institute of Biomedicine, University of Eastern Finland, Kuopio, Finland,* <sup>2</sup>*A.I. Virtanen Institute, University of Eastern Finland, Kuopio, Finland*

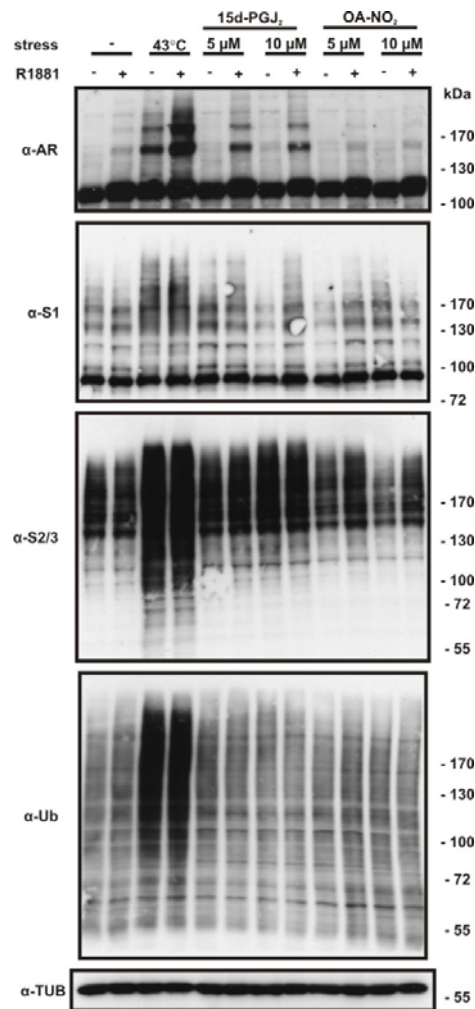

**Fig.S1.** SUMOylation of AR is selectively induced by 15d-PGJ<sub>2</sub> in VCaP prostate cancer cells. VCaP cells were grown with or without R1881 for 2h and exposed to different stressors for 1h as indicated. Lysates were analysed by immunoblotting with anti-AR, anti-SUMO-1, anti-SUMO-2/3, anti-ubiquitin and anti-tubulin antibodies.
